# Supplementary material
Source: Springer Nature journal article supplement (https://www.springermedizin.de/resource/supplementary/12899_2005_81_MOESM7_ESM.pdf/9514890)

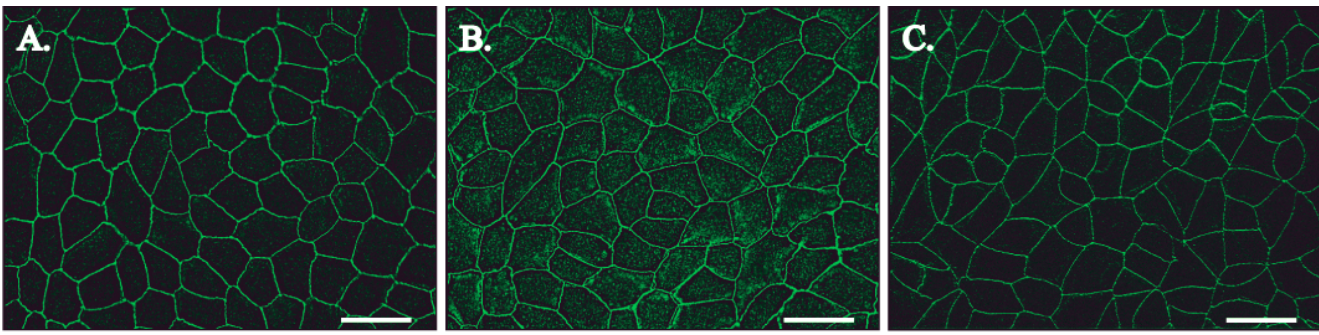

Occludin

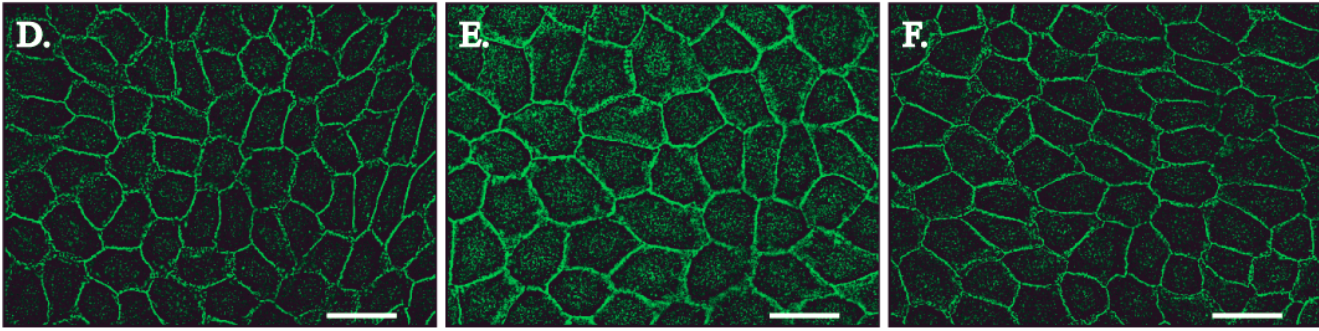

Claudin-1

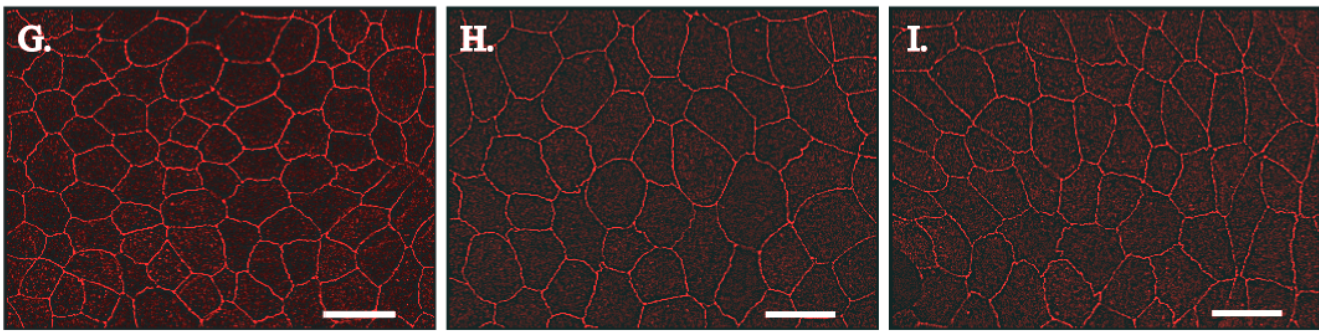

Claudin-2

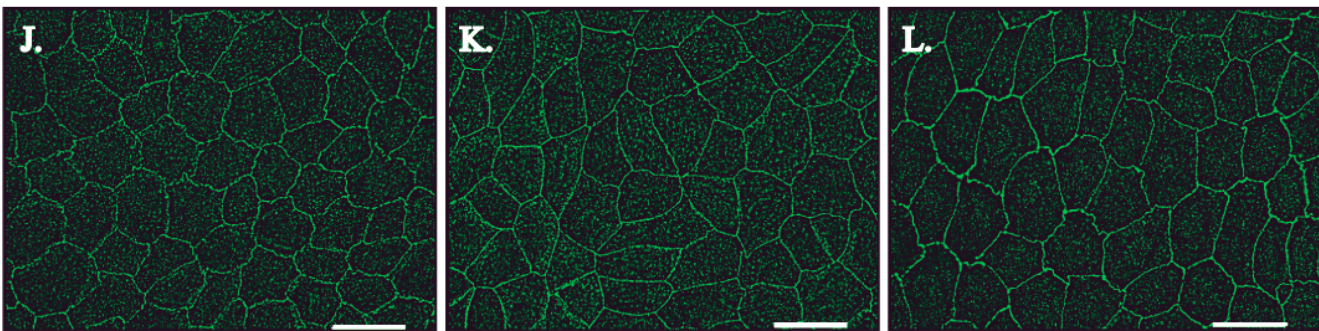

Claudin-3

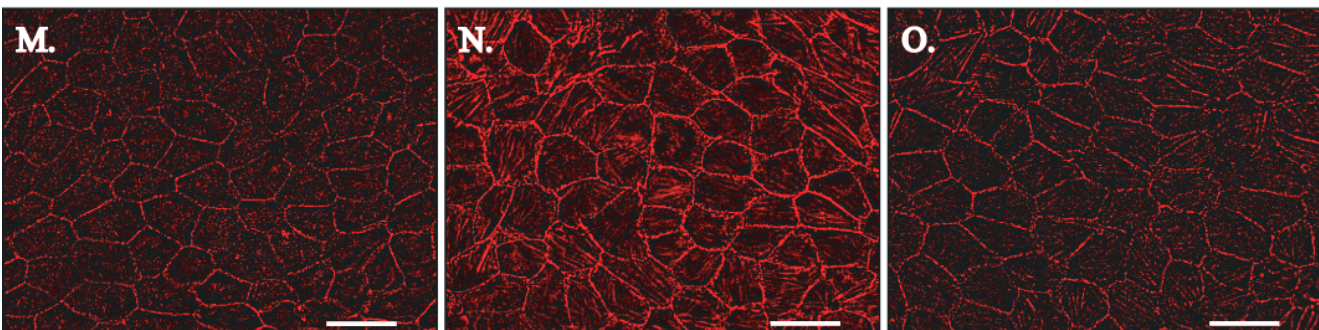

Actin

Control

TNF $\alpha$ /IFN $\gamma$

TNF $\alpha$ /IFN $\gamma$  + U0126

Supplement: MOESM7 [file 9514890]
